# Supplementary material
Source: MDPI journal article supplement (https://www.mdpi.com/2073-4395/12/8/1850)
Supplement: s1 [file s1]

# Supplementary Materials for

## Emissions of greenhouse gases and NO from rice fields and a peach orchard as affected by N input and land-use conversion

Pinshang Xu<sup>1</sup>, Zhaoqiang Han<sup>1</sup>, Jie Wu<sup>1</sup>, Zhutao Li<sup>1</sup>, Jinyang Wang<sup>1,2,\*</sup>, and Jianwen Zou<sup>1,2</sup>

<sup>1</sup> Jiangsu Key Laboratory of Low Carbon Agriculture and GHGs Mitigation, College of Resources and Environmental Sciences, Nanjing Agricultural University, Nanjing 210095, China;

<sup>2</sup> Jiangsu Key Lab and Engineering Center for Solid Organic Waste Utilization, Jiangsu Collaborative Innovation Center for Solid Organic Waste Resource Utilization, Nanjing Agricultural University, Nanjing 210095, China

\* Correspondence: Nanjing Agricultural University, Nanjing 210095, Jiangsu, China. tel.: +86 25 8439 6286; fax: +86 25 8439 5210; e-mail: jywang@njau.edu.cn (J. Wang)

**This file includes:** Tables S1

**Table S1** CH<sub>4</sub> and NO<sub>x</sub> emissions from other rice-wheat rotation studies in the middle and lower reaches of the Yangtze River used in this study

|          | Site                          | Year      | Fertilizer application rate<br>kg N ha <sup>-1</sup> | CH <sub>4</sub><br>kg C ha <sup>-1</sup> | N <sub>2</sub> O<br>kg N ha <sup>-1</sup> | NO<br>kg N ha <sup>-1</sup> | Reference                              |
|----------|-------------------------------|-----------|------------------------------------------------------|------------------------------------------|-------------------------------------------|-----------------------------|----------------------------------------|
| Jiangsu  | 32°35'N, 119°42'0"E           | 2004-2008 | 0                                                    | -1.16                                    | 0.91                                      | 0.15                        | Yao Z, Zheng X, Wang R, et al., 2013   |
|          |                               |           | 225                                                  | -1.2                                     | 3.08                                      | 0.79                        |                                        |
| Nanjing  | 31°52'N, 118°50'E             | 2002-2003 | 0                                                    |                                          | 2.84                                      |                             | Zou J, Huang Y, Lu Y, et al., 2005     |
|          |                               |           | 300                                                  |                                          | 7.27                                      |                             |                                        |
| Wuxi     | 31°37' N, 120°28' E           | 2003-2004 | 0                                                    |                                          | 0.96                                      | 0.29                        | Deng J, Zhou Z, Zheng X, et al., 2012  |
| Huaian   | 32°43'–34°06'N, 118°12'–119°  | 2011-2013 | 300                                                  | 9.58                                     | 13.4                                      | 5.41                        | Lan T, Zhang H, Han Y, et al., 2021    |
|          |                               |           | 0                                                    | 11.5                                     | 8.54                                      | 4.47                        |                                        |
| Yixing   | 31°07'–31°37'N, 119°31'–120°E | 2011-2012 | 0                                                    |                                          | 1.91                                      | 2.22                        | Gao X, Deng O, Ling J, et al., 2018    |
|          |                               |           | 300                                                  |                                          | 3.35                                      | 3.92                        |                                        |
| Huaian   | 32°43'–34°06'N, 118°12'–119°E | 2011-2012 | 0                                                    |                                          | 1.77                                      | 2.36                        |                                        |
|          |                               |           | 300                                                  |                                          | 3.93                                      | 3.49                        |                                        |
| Changshu | 31°32'93"N, 120°41'88"E       | 2009-2010 | 0                                                    | 1.28                                     | 0.75                                      |                             | Ma Y C, Kong X W, Yang B, et al., 2013 |
|          |                               |           | 180                                                  | 6.59                                     | 4.53                                      |                             |                                        |

Zou J, Huang Y, Lu Y, et al. Direct emission factor for N<sub>2</sub>O from rice–winter wheat rotation systems in southeast China[J]. Atmospheric Environment, 2005, 39(26): 4755-4765.

- Deng J, Zhou Z, Zheng X, et al. Annual emissions of nitrous oxide and nitric oxide from rice-wheat rotation and vegetable fields: a case study in the Tai-Lake region, China[J]. *Plant and soil*, 2012, 360(1): 37-53.
- Lan T, Zhang H, Han Y, et al. Regulating CH<sub>4</sub>, N<sub>2</sub>O, and NO emissions from an alkaline paddy field under rice-wheat rotation with controlled release N fertilizer[J]. *Environmental Science and Pollution Research*, 2021, 28(14): 18246-18259.
- Gao X, Deng O, Ling J, et al. Effects of controlled-release fertilizer on nitrous oxide and nitric oxide emissions during wheat-growing season: field and pot experiments[J]. *Paddy and water environment*, 2018, 16(1): 99-108.
- Ma Y C, Kong X W, Yang B, et al. Net global warming potential and greenhouse gas intensity of annual rice-wheat rotations with integrated soil-crop system management[J]. *Agriculture, ecosystems & environment*, 2013, 164: 209-219.
- Yao Z, Zheng X, Wang R, et al. Greenhouse gas fluxes and NO release from a Chinese subtropical rice - winter wheat rotation system under nitrogen fertilizer management[J]. *Journal of Geophysical Research: Biogeosciences*, 2013, 118(2): 623-638.
